# Supplementary material for: The Economic impact of Non-communicable Diseases on households in India
Source: Global Health. 2012 Apr 25;8:9. doi: 10.1186/1744-8603-8-9 (PMC3383461; doi:10.1186/1744-8603-8-9)
Supplement: Additional file 1 — Methodology for determining catastrophic spending and impoverishment due to out of pocket medical expenses. [file 1744-8603-8-9-S1.DOC]

# Additional File 1

# Methodology for determining catastrophic spending and impoverishment due to out of pocket medical expenses

*Catastrophic Spending*

Survival income was defined as the poverty line level of expenditure *multiplied* by household size. Mathematically, for each household “j”, we defined a variable as

Here,is the combined health spending on all hospitalizations for household “j”,is total household consumption spending, is the size of household “j”, and P is the poverty line level of spending. Catastrophic spending is said to occur wheneverexceeds 0.3. We assessed the contribution of NCDs to catastrophic spending of households by estimating the following equation in a logit model:

Hereis a dummy variable indicating whether the household incurred catastrophic spending,is a dummy variable indicating the presence of major NCDs of type “i” in household “j” andrefers to other characteristics of household “j”.

*Impoverishment*

Household “j” and a variable indicating total household spendingwhereindicates the household’s per capita spending (gross of health spending). Letas per capita household spending after deducting total hospitalization spending.

Ifand if, we say that the health expenses of this household are impoverishing. We assessed the contribution of NCDs to catastrophic spending of households by estimating the following equation in a logit model:

Hereis a dummy variable indicating whether health care resulted in household impoverishment,is a dummy variable indicating the presence of major NCDs of type “i” in household “j” andrefers to other household characteristics used as controls.
